# Supplementary material
Source: Springer Nature journal article supplement (https://www.springermedizin.de/resource/supplementary/12935_2009_234_MOESM1_ESM.pdf/9540172)

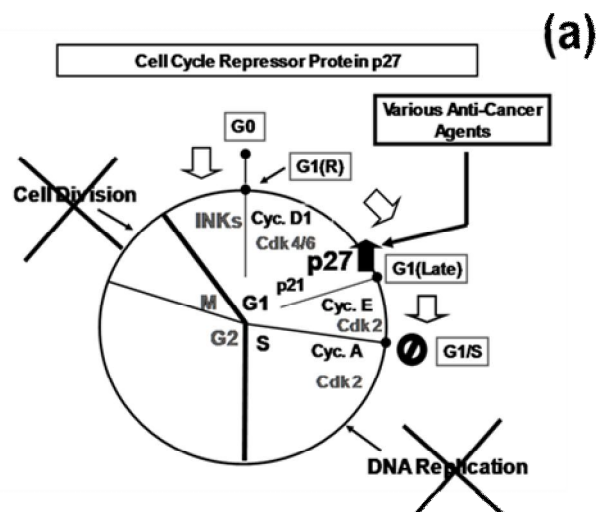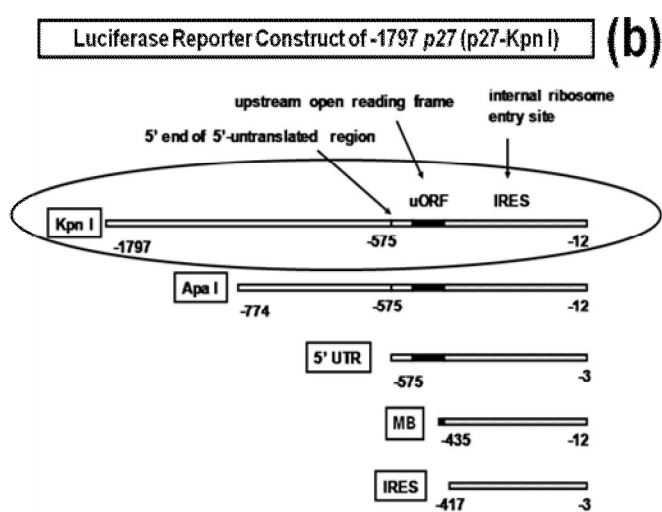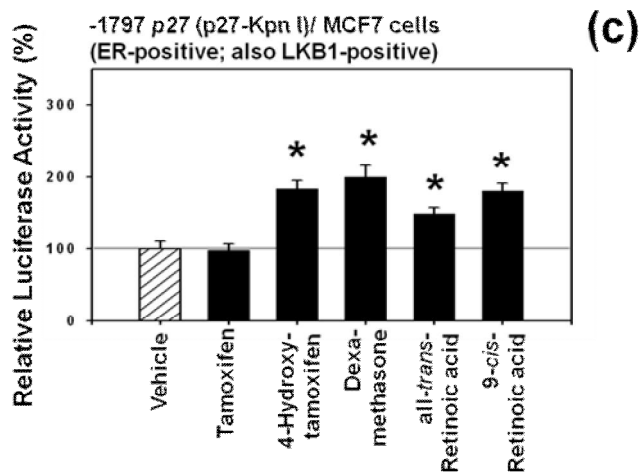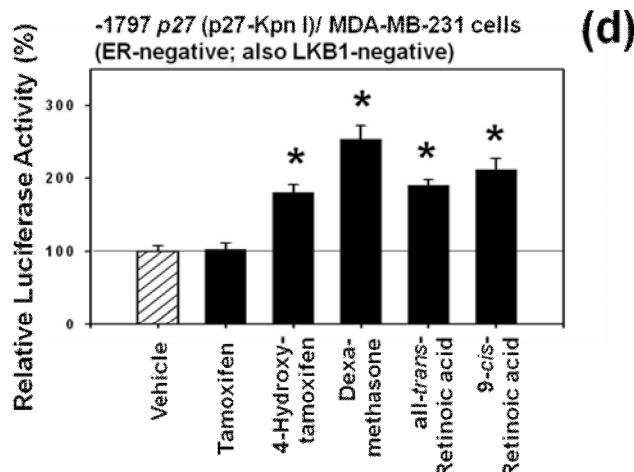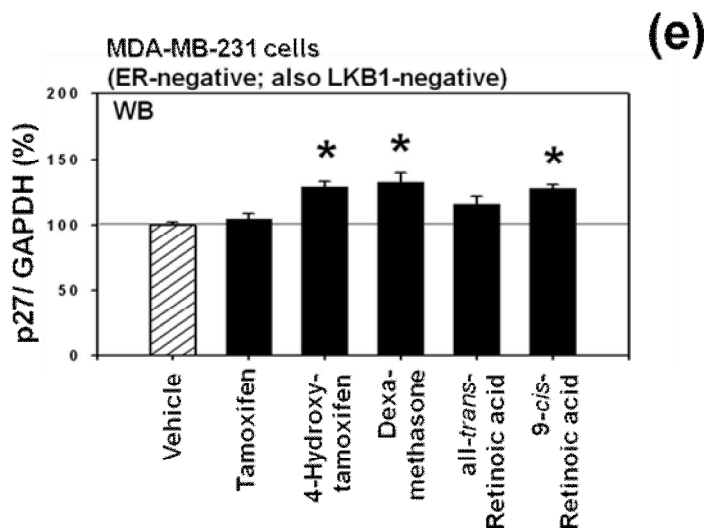

Supplement: MOESM1 [file 9540172]
